# Supplementary material for: Relevance of a molecular tumour board (MTB) for patients’ enrolment in clinical trials: experience of the Institut Curie
Source: PubMed Central journal article supplement — ESMO Open. 2018 Apr 6;3(3):e000339. doi: 10.1136/esmoopen-2018-000339 (PMC5890857; doi:10.1136/esmoopen-2018-000339), 2018-04-06
Supplement: esmoopen-2018-000339supp001.pdf [file esmoopen-2018-000339supp001.pdf]

## **SUPPLEMENTARY MATERIAL & METHODS**

### **Cellularity assessment**

The tumor cellularity is performed on the FFPE and the frozen specimens. The most representative FFPE bloc of the metastasis is recorded in order to facilitate any further molecular analyses based on the nucleic acids extracted from this bloc.

The respective percentage of tumor cells, the percentage of in situ versus invasive lesions, of lymphoid infiltrates, of (myo)-fibroblasts and the existence of necrosis areas are taken into account.

Macrodissection is performed if necessary to enrich the tumor samples with tumoral cells before nucleic acid extraction.

### **Immunohistochemistry of PTEN**

The genomic loss or a deletion of PTEN has been validated using immunohistochemistry. The monoclonal antibody specific of the PTEN amino acids 321 to 336 has been used (Zymed® laboratories). Internal control was a positive expression of PTEN in the stromal fibroblasts. A normal prostate tissue was used for an external control in every manipulation. Interpretation of the staining determined the percentage of tumoral positive cells, the intensity of the staining on a three-tiered scale (from 1 to 3) as well as the good quality of the external control and the presence of the internal control.

### **CGH array**

DNA was extracted according to a standard phenol/chloroform method using Phase Lock Gel Light (Eppendorf, Hamburg, Germany). The quantity and quality of the obtained DNA were estimated in 2 steps. Firstly, a Nanodrop spectrophotometer was used to assess gDNA purity (for optimal labeling yield, samples should have  $A_{260}/A_{280} \geq 1.8$  and  $A_{260}/A_{230} \geq 1.9$ ). Then, a Qubit dsDNA BR Assay Kit was used to measure the double-stranded DNA concentration.

For each sample having good quality and sufficient quantity, 700 to 1000 ng of tumor DNA and reference DNA were labeled, purified and cohybridized in equal quantity to Agilent Microarrays (Agilent Technologies, Santa Clara, USA) over 12 to 24 hours. Arrays were washed and scanned according to the manufacturer's protocols (Agilent, cat. No: G4884A).

Images were acquired on a SureScan Microarray Scanner using the CytoScan Software V.2.7, then analysed on CytoGenomics Software V.2.7. Profiles were validated as interpretable when they obtained good quality reports based on the classical parameters for aCGH such as the sex mismatch dynamics between the control and the tested sample, standard deviation of the  $\text{Log}_2(R)$  around zero, and thickness of the smoothing signal. For each profile, tumoral cells content was taken into account to evaluate the alterations of interest and adapt the proposed  $\text{Log}_2(R)$  threshold for focal Amplification ( $<10\text{Mb}$   $>6-8$  copies in a diploid context), Hemizygous losses (1 copie) and Homozygous losses (no copy at all)

### **Microsatellite instability analysis**

DNA was extracted from macro-dissected FFPE tumor sections using Macherey-Nagel Tissue DNA extraction Kit and quantified using a Qubit dsDNA BR Assay Kit (cat. No: Q32850). MSI analysis was performed with MSI Analysis System (Promega) consisting of mononucleotide repeats BAT-25, BAT-26, NR-21, NR-24, MONO-27 (and pentanucleotide repeats Penta C and Penta D for sample identification).

For detection of MSI, 10 ng of DNA was amplified with 1x primer mix, 1x Gold STR Buffer (Promega), and 0.5U Amplitaq Gold DNA Polymerase (ThermoFischer) in a GeneAmp PCR System 9700 Thermocycler (Applied Biosystems) following manufacturer's recommended amplification conditions for the MSI Analysis System. PCR products were denatured in deionized formamide with Internal Lane Standard 600 (Promega) for allele sizing and analyzed on a 3130xl Genetic Analyzer using GeneMapper 4.0 Software (Applied Biosystems). Samples were classified as MSI-High (MSI-H) when two or more markers out of a panel of five were unstable and MSI stable when there were no unstable markers.

### **NGS panel**

Theranostic NGS panel is a custom targeted Generead DNaseq panel (Qiagen) including *AKT1*, *ALK*, *BRAF*, *CTNNB1*, *EGFR*, *ERBB2*, *ERBB4*, *FBXW7*, *FGFR1*, *FGFR2*, *FGFR3*, *HRAS*, *KIT*, *KRAS*, *MAP2K1*, *MAP2K2*, *MET*, *NOTCH1*, *NRAS*, *PDGFRA*, *PIK3CA* and *ROS1* genes.

For each sample, DNA libraries were prepared using Generead DNaseq panel PCR kit (Qiagen). Targeted NGS was performed using Illumina Miseq technology according to the manufacturer's instructions (Illumina, San Diego, CA, USA). Sequence data were aligned to the human reference genome (hg19) using Bowtie2 algorithm. The single nucleotide variants (SNVs) and indels were called using GATK Unified Genotyper with default parameters. Known variants found in dbsnp129 and dbsnp137 with a variant allele frequency (VAF) superior to 1% (1000g or ESP6500) were removed. Filtered retained variants must have a total coverage depth of greater than or equal to 300 reads and VAF of at least 1%.

**Supplementary Table 1:** Molecular alterations and classes of drugs received by the 45 patients included in clinical trials

| <b>Tumor location</b> | <b>Molecular alterations</b>             | <b>Class of drug</b> | <b>Best overall response (CR/PR/SD/PD selon RECIST)</b> |
|-----------------------|------------------------------------------|----------------------|---------------------------------------------------------|
| Ovary                 | KRAS mutation                            | RAF inhibitor        | NE                                                      |
| Ovary                 | AKT2 amplification                       | mTOR inhibitor       | PD                                                      |
| Ovary                 | PTEN loss                                | mTOR inhibitor       | SD                                                      |
| Ovary                 | KRAS mutation                            | RAF inhibitor        | NA                                                      |
| Ovary                 | PIK3R2                                   | mTOR inhibitor       | PD                                                      |
| Ovary                 | PTEN loss                                | mTOR inhibitor       | PD                                                      |
| Ovary                 | RICTOR amplification                     | mTOR inhibitor       | SD                                                      |
| Ovary                 | PTEN deletion                            | mTOR inhibitor       | PR                                                      |
| Ovary                 | PTEN deletion                            | mTOR inhibitor       | NA                                                      |
| Ovary                 | KRAS mutation                            | RAF inhibitor        | PD                                                      |
| Ovary                 | PIK3CA amplification                     | mTOR inhibitor       | SD                                                      |
| Ovary                 | KRAS mutation                            | RAF inhibitor        | PD                                                      |
| Breast                | PIK3CA mutation                          | mTOR inhibitor       | PD                                                      |
| Breast                | PIK3CA mutation                          | mTOR inhibitor       | PD                                                      |
| Breast                | FGFR amplification                       | mTOR inhibitor       | PD                                                      |
| Breast                | PIK3CA mutation                          | mTOR inhibitor       | PR                                                      |
| Breast                | HRAS mutation                            | RAF inhibitor        | PD                                                      |
| Breast                | NOTCH2 amplification                     | NOTCH inhibitor      | PD                                                      |
| Colorectal            | AKT2 amplification                       | mTOR inhibitor       | NE                                                      |
| Colorectal            | KRAS mutation                            | RAF inhibitor        | PD                                                      |
| Colorectal            | PIK3CA mutation                          | mTOR inhibitor       | SD                                                      |
| Colorectal            | FBXW7 mutation                           | NOTCH inhibitor      | SD                                                      |
| Colorectal            | PTEN loss                                | mTOR inhibitor       | PR                                                      |
| Colorectal            | NRAS mutation                            | RAF inhibitor        | SF                                                      |
| Cervix                | PIK3CA mutation                          | mTOR inhibitor       | SD                                                      |
| Cervix                | PIK3CA mutation                          | mTOR inhibitor       | CR                                                      |
| Cervix                | PTEN mutation                            | mTOR inhibitor       | PD                                                      |
| Cervix                | KRAS mutation                            | RAF inhibitor        | SF                                                      |
| Prostate              | PTEN mutation                            | mTOR inhibitor       | PD                                                      |
| Prostate              | KIT mutation                             | KIT inhibitor        | PD                                                      |
| Prostate              | PTEN deletion                            | mTOR inhibitor       | PD                                                      |
| Uterus                | KDR/VEGFR2, PDGFRA and KIT amplification | VEGFR2 inhibitor     | PD                                                      |
| Uterus                | KRAS mutation                            | RAF inhibitor        | SD                                                      |
| Uterus                | PIK3CA mutation and PTEN loss            | mTOR inhibitor       | PD                                                      |
| Pancreas              | KRAS mutation                            | RAF inhibitor        | SF                                                      |
| Pancreas              | KRAS mutation                            | RAF inhibitor        | NA                                                      |

|               |                               |                  |    |
|---------------|-------------------------------|------------------|----|
| Urothelial    | KDR mutation                  | VEGFR2 inhibitor | SD |
| Urothelial    | PTEN Loss                     | mTOR inhibitor   | PD |
| Bone          | PIK3CA mutation               | mTOR inhibitor   | PD |
| Brain         | NOTCH4 mutation               | NOTCH inhibitor  | PD |
| Head and neck | PIK3CA mutation and PTEN loss | PI3K inhibitor   | PD |
| Liver         | KRAS mutation                 | RAF inhibitor    | SD |
| Lung          | STK11 inactivation            | mTOR inhibitor   | SD |
| Skin          | PTEN loss                     | mTOR inhibitor   | PD |
| Unknown       | PTEN deletion                 | mTOR inhibitor   | PD |

NA = not available; NE = not evaluable; CR = complete response, PR = partial response; SD = stable disease, PD = progressive disease; SF = screen failed (patient not treated)
